# Supplementary material
Source: ML conference proceedings conference paper supplement (https://proceedings.mlr.press/v119/zhou20f.html)
Supplement: Supplementary file [file zhou20f-supp.pdf]

### A. Proof of Proposition 3.3

This result directly follows Theorem 5.5 in Araújo et al. (2019). Let  $B_{\text{GD}}^\infty$  denote the infinitely wide network trained by gradient descent in the limit of  $M \rightarrow \infty$ . By the results in Theorem 5.5 of Araújo et al. (2019), we have

$$\mathbb{D}[S_{\text{GD}}^m, B_{\text{GD}}^\infty] = \mathcal{O}_p \left( n \exp(c_1 \exp(c_2 n)) \left( \frac{1}{\sqrt{m}} + \sqrt{\eta} \right) \right),$$

where we explicitly give the dependency of constant  $C_{5.5}$  in Araújo et al. (2019) on the depth  $n$ , because  $C_{5.5} = O(\exp(c_1 \times C_{B.16}))$ , where  $C_{B.16} = O(\exp(c_2 n))$  and  $c_1$  is some positive constant. See Lemma 12.2 in Araújo et al. (2019) for details.

Similarly,

$$\mathbb{D}[S_{\text{GD}}^m, B_{\text{GD}}^\infty] = \mathcal{O}_p \left( n \exp(c_1 \exp(c_2 n)) \left( \frac{1}{\sqrt{M}} + \sqrt{\eta} \right) \right).$$

Combining this, we have

$$\begin{aligned} \mathbb{D}[B_{\text{GD}}^M, B_{\text{GD}}^M] &\leq \mathbb{D}[S_{\text{GD}}^m, B_{\text{GD}}^\infty] + \mathbb{D}[B_{\text{GD}}^M, B_{\text{GD}}^\infty] \\ &= \mathcal{O}_p \left( n \exp(c_1 \exp(c_2 n)) \left( \frac{1}{\sqrt{m}} + \frac{1}{\sqrt{M}} + \sqrt{\eta} \right) \right). \end{aligned}$$

### B. Proof of Theorem 3.5

**Assumption 3.4** Denote by  $S_{\text{WIN}}^m$  the result of mimicking  $B_{\text{GD}}^M$  following Algorithm 1. When training  $S_{\text{WIN}}^m$ , we assume the parameters of  $S_{\text{WIN}}^m$  in each layer are initialized by randomly sampling  $m$  neurons from the the corresponding layer of the wide network  $B_{\text{GD}}^M$ . Define  $B_{\text{GD},[i:n]}^M = B_n^M \circ \dots \circ B_i^M$ .

**Theorem 3.5** Assume all the layers of  $B_{\text{GD}}^M$  are Lipschitz maps and all its parameters are bounded by some constant. Under the assumptions 3.1, 3.2, 3.4, we have

$$\mathbb{D}[S_{\text{WIN}}^m, B_{\text{GD}}^M] = \mathcal{O}_p \left( \frac{\ell_B n}{\sqrt{m}} \right),$$

where  $\ell_B = \max_{i \in [n]} \left\| B_{\text{GD},[i+1:n]}^M \right\|_{\text{Lip}}$  and  $\mathcal{O}_p(\cdot)$  denotes the big  $O$  notation in probability, and the randomness is w.r.t. the random initialization of gradient descent, and the random mini-batches of stochastic gradient descent.

*Proof.* To simplify the notation, we denote  $B_{\text{GD}}^M$  by  $B^M$  and  $S_{\text{WIN}}^m$  by  $S^m$  in the proof. We have

$$\begin{aligned} B^M(\mathbf{x}) &= (B_n^M \circ B_{n-1}^M \circ \dots \circ B_1^M)(\mathbf{x}) \\ S^m(\mathbf{x}) &= (S_n^m \circ S_{n-1}^m \circ \dots \circ S_1^m)(\mathbf{x}). \end{aligned}$$

We define

$$B_{[k_1:k_2]}^M(\mathbf{z}) = (B_{k_2}^M \circ B_{k_2-1}^M \circ \dots \circ B_{k_1}^M)(\mathbf{z}),$$

where  $\mathbf{z}$  is the input of  $B_{[k_1:k_2]}^M$ . Define

$$\begin{aligned} F_0(\mathbf{x}) &= (B_n^M \circ \dots \circ B_3^M \circ B_2^M \circ B_1^M)(\mathbf{x}) \\ F_1(\mathbf{x}) &= (B_n^M \circ \dots \circ B_3^M \circ B_2^M \circ S_1^m)(\mathbf{x}) \\ F_2(\mathbf{x}) &= (B_n^M \circ \dots \circ B_3^M \circ S_2^m \circ S_1^m)(\mathbf{x}) \\ &\dots \\ F_n(\mathbf{x}) &= (S_n^m \circ \dots \circ S_3^m \circ S_2^m \circ S_1^m)(\mathbf{x}), \end{aligned}$$

following which we have  $F_0 = B^M$  and  $F_n = S^m$ , and hence

$$\mathbb{D}[S^m, B^M] = \mathbb{D}[F_n, F_0] \leq \sum_{k=1}^n \mathbb{D}[F_k, F_{k-1}].$$

Define  $\ell_{i-1} := \left\| B_{[i:n]}^M \right\|_{\text{Lip}}$  for  $i \in [n]$  and  $\ell_n = 1$ . Note that

$$\begin{aligned} \mathbb{D}[F_1, F_0] &= \sqrt{\mathbb{E}_{\mathbf{x} \sim \mathcal{D}} \left[ \left( B_{[2:n]}^M \circ B_1^M(\mathbf{x}) - B_{[2:n]}^M \circ S_1^m(\mathbf{x}) \right)^2 \right]} \\ &\leq \ell_1 \sqrt{\mathbb{E}_{\mathbf{x} \sim \mathcal{D}} \left[ \left( B_1^M(\mathbf{x}) - S_1^m(\mathbf{x}) \right)^2 \right]} \end{aligned}$$

By the assumption that we initialize  $S_1^m(\mathbf{x})$  by randomly sampling neurons from  $B_1^M(\mathbf{x})$ , we have, with high probability,

$$\sqrt{\mathbb{E}_{\mathbf{x} \sim \mathcal{D}} \left[ \left( B_1^M(\mathbf{x}) - S_1^m(\mathbf{x}) \right)^2 \right]} \leq \frac{c}{\sqrt{m}},$$

where  $c$  is constant depending on the bounds of the parameters of  $B^M$ . Therefore,

$$\mathbb{D}[F_1, F_0] = \mathcal{O}_p \left( \frac{\ell_1}{\sqrt{m}} \right).$$

Similarly, we have

$$\mathbb{D}[F_k, F_{k-1}] = \mathcal{O} \left( \frac{\ell_k}{\sqrt{m}} \right), \quad \forall k = 2, \dots, n.$$

Combine all the results, we have

$$\mathbb{D}[B^M, S^m] = \mathcal{O} \left( \frac{n \max_{k \in [n]} \ell_k}{\sqrt{m}} \right).$$

□

**Remark** Since the wide network  $B_{\text{GD}}^M$  is observed to be easy to train, it is expected that it can closely approximate the underlying true function and behaves nicely, hence yielding a small  $\ell_B$ . An important future direction is to develop rigorous theoretical bounds for controlling  $\ell_B$ .
